# Supplementary material
Source: PubMed Central journal article supplement (PMC3271888)
Supplement: 1103100109_pnas.201103100SI.pdf [file 1103100109_pnas.201103100SI.pdf]

# Supporting Information

Przybyla and Voldman 10.1073/pnas.1103100109

## SI Materials and Methods

**Perfusion Device Fabrication.** The microfluidic perfusion device was molded from polydimethylsiloxane (PDMS; Corning), after mixing in a ratio of 10:1 base to curing agent and degassing in a vacuum chamber for 30 min. The mold was fabricated from an Autocad file using a stereolithography foundry (FineLine Prototyping). The fluidic and vacuum layers were cured separately and bonded after exposure to oxygen plasma. Input and output fluid holes, as well as vacuum line holes, were punched using a 0.072-inch-diameter hypo tube. The device layout consists of two sets of triplicate millimeter-sized enclosed culture chambers with individual addressability to enable two experimental conditions side by side. These chambers are connected to external syringe pumps that provide continuous pulse-free perfusion, and the chip also includes microvalves to direct liquid flow and cells to the desired locations.

**Culture Media Additives.** The following concentrations of culture media additives were used for all experiments: Activin 30 ng/mL (Peprotech), FGF2 12 ng/mL (Peprotech), PD0325901 1  $\mu$ M (Stemgent), CHIR99021 3  $\mu$ M (Stemgent), sodium chlorate 20 mM (Sigma-Aldrich), heparin 1  $\mu$ g/mL (Sigma), collagenase 1 ng/mL (Sigma #C9722), JAK inhibitor I 1  $\mu$ M (Calbiochem), and Ro 32-3555 50  $\mu$ M (Tocris). Conditioned media was concentrated from a 10-cm static culture dish using spin filter concentrator columns with a 3-kDa molecular mass cutoff (Millipore).

**Perfusion Culture Conditions.** For all perfusion experiments, mouse embryonic stem cells (mESCs) at a density of  $1 \times 10^6$  cells/mL were loaded into the device, and perfusion was initiated once the cells were firmly attached to the surface. For pulse perfusion, 50  $\mu$ L of media per side of a device (three chambers) was perfused in a span of 30 min once every 8 h to completely replenish the media in all three chambers ( $\approx 4$ - $\mu$ L chamber volume). For recirculating perfusion, a peristaltic pump (Rainin Dynamax) was used at a flow rate of 0.1 mL/h with a media reservoir of 500  $\mu$ L in an Eppendorf tube to create a total recirculating volume of approximately 1 mL.

**Quantitative RT-PCR.** Cells were harvested using TrypLE Express trypsin replacement (Invitrogen), and total RNA was isolated using the RNeasy Mini Kit (Qiagen), according to manufacturer's instructions. RNA was converted to cDNA using the DyNAmo cDNA synthesis kit with Oligo(dT) primer, and quantitative PCR reactions were set up using the DyNAmo SYBR Green qPCR kit (New England Biolabs), according to the manufacturer's instructions. Reactions were run on an MJ Opticon DNA Engine thermal cycler. Primers are listed in Table S1. Quantitative RT-PCR array analysis was performed using an mESC-specific PCR array (PAMM-081; SABiosciences).

**Flow Cytometry.** After harvesting cells, direct intracellular immunostaining was performed with an Alexa Fluor 647-linked anti-mouse Nanog antibody (eBioscience). Internal fluorescent intensity was measured on a FACSCaliber flow cytometer (BD Biosciences).

**Immunofluorescence.** For phospho-Stat3 and phospho-ERK1/2 staining, cells were incubated overnight with phosphorylated Stat3 antibody (Cell Signaling Technology) or phosphorylated ERK1/2 antibody (BD Biosciences), both at 1:100, and secondary antibody (anti-rabbit GFP and anti-mouse AF546, respectively;

Invitrogen) was added for 2 h at 1:1,000. For HepSS, cells were blocked with endogenous biotin blocking kit (Invitrogen) and incubated overnight with HepSS antibody at 1:100 (Lifespan Biosciences), and secondary antibody (TMR NeutrAvidin; Invitrogen) was added at 1:500 for 1 h. For Oct4, cells were incubated overnight with primary Oct4 antibody (Abcam) at 5  $\mu$ g/mL, and secondary antibody (anti-goat Cy3; Abcam) was added for 1 h at 1:250. Staining along the chamber was quantified using an automated MATLAB script, and differences in staining intensity in any area within the chamber was not found to be statistically significant. All cells were counterstained with 1:100,000 Hoechst (Sigma).

**Embryoid Body Formation.** ESCs were harvested from culture and replated at  $4 \times 10^5$  cells in a 60-mm ultralow attachment culture dish (Corning). Cells were grown in ESC medium with no leukemia inhibitory factor (LIF), and medium was replenished every 2 d.

**ELISA.** ELISA was performed on samples from static conditioned medium or from the medium collected from the perfusion output. Cells were either perfused for 30 h or remained in static culture for 30 h, and medium was collected. Results were normalized by the average cell density (using an exponential growth model and the initial/final cell numbers) and duration to determine a secretion in grams per cell per hour under both conditions. Because of the discrepancy in volume between these two types of samples, perfusion output medium was spun down using an Amicon 3-kDa cutoff filter spin column and reconstituted to the same volume as the static conditioned medium. VEGF ELISA was purchased from R&D Systems, and assay was performed according to the manufacturer's instructions. Matrix metalloproteinase (MMP) 2 ELISA was purchased from RayBiotech, and assay was performed according to the manufacturer's instructions.

**Cell Recovery.** To capture and count cells recovered from the perfusion device, cells were collected into 4% formaldehyde and transferred to 4  $^{\circ}$ C twice daily. All recovered cells were combined and stained with Hoechst (Sigma), then transferred to a black-walled 96-well plate, where they were automatically scanned and counted using a MATLAB script that was previously calibrated using known quantities of cells collected, treated, and counted in the same manner as the cells recovered from the device.

**Statistical Analysis.** All results were analyzed by Student's *t* test, and the resulting pairwise *P* values are reported. Significance was established at  $P < 0.05$  and was evaluated up to the level of  $P < 0.001$ .

## SI Discussion

**Fluid Transport Qualitative Model.** *Pe* is given by  $vh/D$ , where  $v$  is a characteristic fluid velocity in the system (in our case, the average velocity,  $\approx 0.0296$  mm/s),  $h$  is a characteristic length (in our case, half the chamber height, 125  $\mu$ m), and  $D$  is the diffusivity of a relevant molecules (for a  $\approx 20$ -kDa cytokine,  $D \approx 10^{-6}$  cm<sup>2</sup>/s). This results in  $Pe \approx 37$ , where  $Pe > 1$  indicates a convection-dominated regime. The ratio of the Peclet number and the Damkohler number *Da* is given by  $v/k_{on}R_s$ , where  $k_{on}$  is the ligand binding on-rate ( $\approx 10^6$  M<sup>-1</sup>s<sup>-1</sup> for a strong interaction) and  $R_s$  is the receptor density (which we take to be  $\approx 12$  receptors/ $\mu$ m<sup>2</sup> for an 8- $\mu$ m radius cell with  $\approx 10,000$  receptors). This results in  $Pe/Da$  of  $\approx 1,500$ , indicating that convection dominates over reaction.



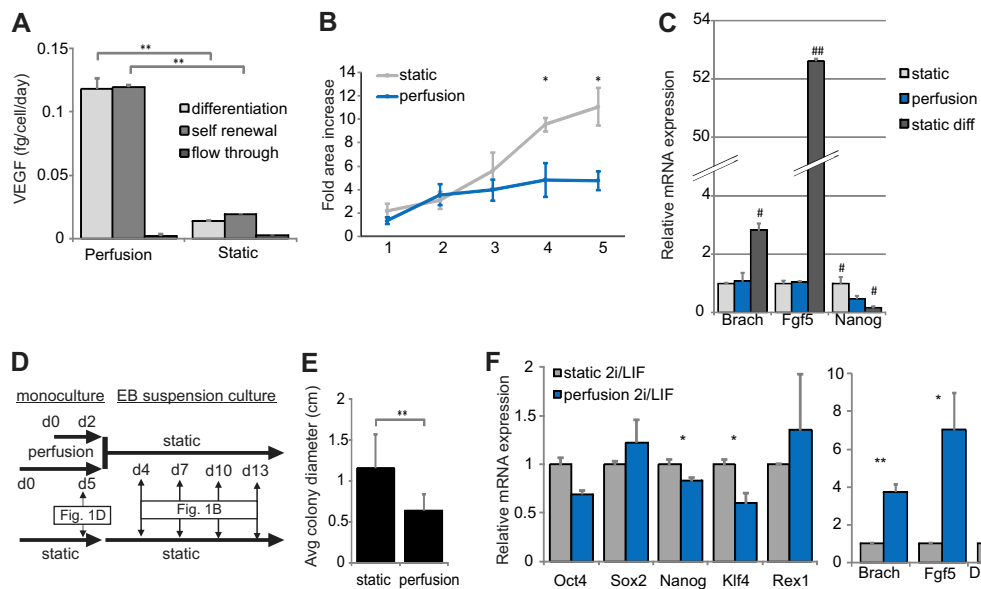

**Fig. 52.** Soluble factor removal and cell characteristics under perfusion. (A) ELISA measurements of VEGF collected from mESCs cultured in static and perfused systems, either in self-renewal (N2B27+LIF+BMP4) or differentiation (N2B27) environments. Also shown are the VEGF levels measured in systems without cells ("flow through"). (B) Fold increase in area of static or perfusion culture surfaces covered by cells over time. A 50-mm<sup>2</sup> area was analyzed at each time point under each condition. (C) mRNA expression levels of key markers after 3 d of growth in static or perfusion self-renewal culture or in static differentiation culture. (D) Schematic depicting the experimental progression used to culture cells in static or perfusion before subjecting them to embryoid body (EB) suspension culture, the results of which are depicted in Fig. 1B (main text). (E) Day-5 average colony diameter. (F) mRNA expression levels of self-renewal (Left) or differentiation (Right) markers after 5 d in static or perfusion culture in N2B27+2i/LIF media. **\*\*** $P < 0.001$ , **\*** $P < 0.05$ ; **#** $P < 0.05$ , **##** $P < 0.001$  for all pairwise comparisons; error bars represent SD.

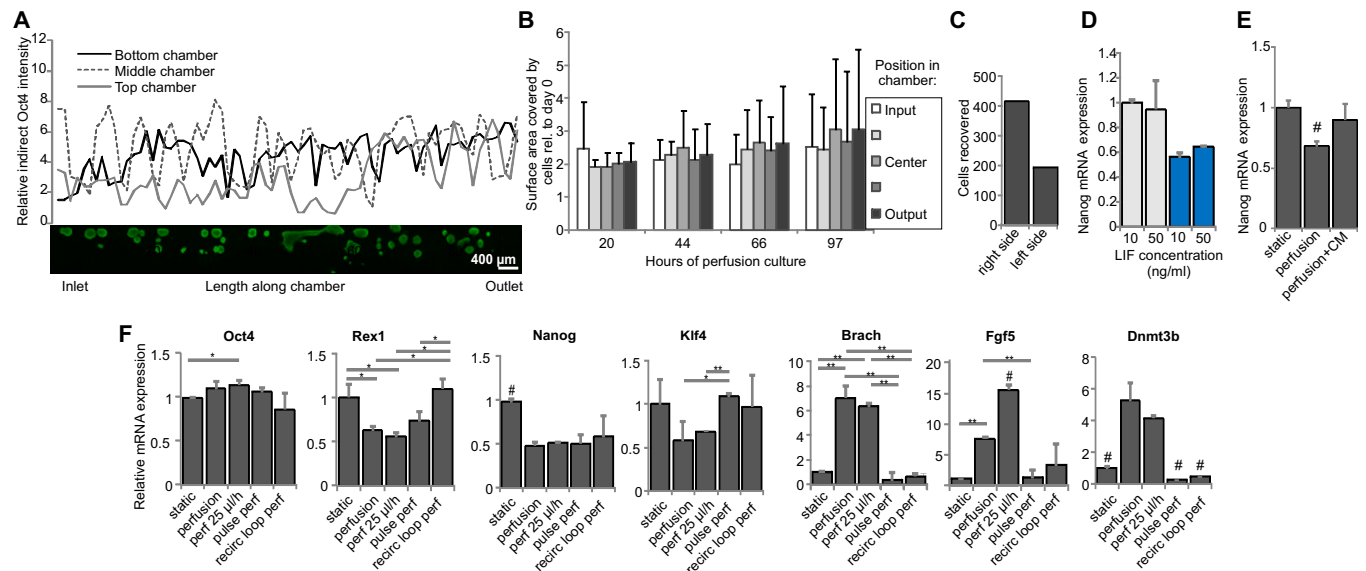

**Fig. 53.** Spatial analysis and physical manipulations of cells grown under perfusion. (A) Quantification and image of Oct4 immunofluorescent staining of day-5 perfusion culture to assess the relative abundance of marker expression along the length of the chamber. No statistically significant trend was apparent ( $P = 0.53$ ). (B) Quantification of surface area covered by cells over time on average between six chambers along the length of the chambers (light to dark gray). (C) Quantification of cells recovered from the perfused microdevice output over 5 d. Each bar represents the total number of cells recovered per chamber on either side of the device (three chambers per side). (D) Nanog mRNA expression levels in static and perfusion with either 10 ng/mL LIF or 50 ng/mL LIF. (E) Nanog mRNA expression levels in static and perfusion in the presence of serum+LIF media, with or without the addition of soluble cell-secreted factors from static conditioned media (CM). (F) mRNA expression levels of self-renewal and differentiation markers in normal static and perfusion cultures compared with levels in cells grown under perfusion with fourfold lower volume flow rate than normal (perf 25  $\mu$ l/h), cells grown in a perfusion device with feeding intervals akin to those in static (pulse perf), and cells grown under recirculating perfusion in a total volume of 1 mL (recirc loop perf). **\*\*** $P < 0.001$ , **\*** $P < 0.05$ ; **#** $P < 0.05$  for all pairwise comparisons; error bars represent SD.









**Table S2. Quantification of expression levels of genes in a stem cell marker panel in static and perfusion cultures at days 3 and 5 of culture, compared with expression levels on day 0**

| Gene           | Static day 3 | Perfusion day 3 | Static day 5 | Perfusion day 5 |
|----------------|--------------|-----------------|--------------|-----------------|
| <i>Afp</i>     | 25.42        | 0.824           | 115.4        | 2.312           |
| <i>Bxdc2</i>   | 0.673        | 0.775           | 0.580        | 0.372           |
| <i>Cd34</i>    | 0.614        | 0.922           | 0.767        | 0.777           |
| <i>Cd9</i>     | 1.231        | 0.990           | 2.259        | 0.705           |
| <i>Cdh5</i>    | 1.406        | 12.95           | 4.356        | 18.68           |
| <i>Cdx2</i>    | 3.449        | 0.961           | 13.89        | 4.588           |
| <i>Col1a1</i>  | 1.223        | 1.304           | 2.205        | 3.925           |
| <i>Commd3</i>  | 0.895        | 1.271           | 1.678        | 1.252           |
| <i>Crabp2</i>  | 0.796        | 1.671           | 0.934        | 4.878           |
| <i>Ddx4</i>    | 0.964        | 0.491           | 1.160        | 0.501           |
| <i>Des</i>     | 1.109        | 0.361           | 1.379        | 0.562           |
| <i>Diap2</i>   | 1.458        | 0.984           | 0.568        | 1.009           |
| <i>Dnmt3b</i>  | 1.651        | 4.684           | 1.122        | 5.875           |
| <i>Ednrb</i>   | 0.713        | 1.401           | 1.593        | 2.027           |
| <i>Eomes</i>   | 2.195        | 1.158           | 2.715        | 1.058           |
| <i>Fgf4</i>    | 1.366        | 1.003           | 0.976        | 0.767           |
| <i>Fgf5</i>    | 22.72        | 30.72           | 23.93        | 115.6           |
| <i>Ft1</i>     | 4.886        | 4.410           | 13.82        | 11.56           |
| <i>Fn1</i>     | 1.600        | 1.120           | 1.060        | 1.296           |
| <i>Foxa2</i>   | 3.852        | 5.949           | 9.652        | 10.03           |
| <i>Foxd3</i>   | 0.518        | 0.827           | 0.356        | 0.867           |
| <i>Gabrb3</i>  | 1.780        | 1.177           | 1.473        | 2.019           |
| <i>Gal</i>     | 0.784        | 0.578           | 1.511        | 1.464           |
| <i>Gata4</i>   | 2.021        | 3.251           | 4.336        | 4.038           |
| <i>Gata6</i>   | 1.522        | 3.964           | 4.649        | 4.752           |
| <i>Gbx2</i>    | 0.243        | 0.219           | 0.174        | 0.059           |
| <i>Gcg</i>     | ND           | ND              | ND           | ND              |
| <i>Gcm1</i>    | 1.307        | ND              | 1.361        | ND              |
| <i>Gdf3</i>    | 0.725        | 0.808           | 0.623        | 0.640           |
| <i>Grb7</i>    | 2.194        | 1.168           | 2.143        | 2.811           |
| <i>Hba-x</i>   | 2.570        | 1.884           | 3.436        | 3.568           |
| <i>Hbb-y</i>   | ND           | ND              | ND           | ND              |
| <i>Hck</i>     | 0.641        | 0.193           | 0.557        | 0.123           |
| <i>lapp</i>    | ND           | ND              | ND           | ND              |
| <i>Ifitm1</i>  | 1.743        | 1.163           | 0.831        | 1.067           |
| <i>Ifitm2</i>  | 0.696        | 0.857           | 0.422        | 0.564           |
| <i>Igf2bp2</i> | 1.372        | 1.239           | 2.085        | 1.438           |
| <i>Il6st</i>   | 0.712        | 0.726           | 0.721        | 0.752           |
| <i>Ins2</i>    | 1.638        | 1.583           | 3.016        | 4.097           |
| <i>Kit</i>     | 1.427        | 2.001           | 3.662        | 5.039           |
| <i>Krt1</i>    | 1.546        | 3.450           | 1.278        | 8.982           |
| <i>Lama1</i>   | 1.688        | 2.910           | 5.201        | 8.675           |
| <i>Lamb1-1</i> | 2.763        | 5.559           | 7.287        | 11.54           |
| <i>Lamc1</i>   | 2.025        | 3.903           | 5.544        | 10.43           |
| <i>Lefty1</i>  | 6.377        | 6.341           | 3.640        | 7.515           |
| <i>Lefty2</i>  | 8.879        | 4.911           | 3.595        | 7.003           |
| <i>Lifr</i>    | 0.814        | 0.828           | 1.056        | 1.391           |
| <i>Lin28</i>   | 1.088        | 1.267           | 0.981        | 1.804           |
| <i>Myf5</i>    | ND           | ND              | ND           | ND              |
| <i>Myod1</i>   | ND           | ND              | ND           | ND              |
| <i>Nanog</i>   | 0.751        | 0.356           | 0.604        | 0.340           |
| <i>Nes</i>     | 1.715        | 1.496           | 3.188        | 8.222           |
| <i>Neurod1</i> | 0.950        | 1.723           | 1.190        | 1.505           |
| <i>Nodal</i>   | 0.887        | 0.750           | 0.909        | 0.909           |
| <i>Nog</i>     | 9.297        | 31.35           | 26.47        | 57.41           |
| <i>Nr5a2</i>   | 0.597        | 0.595           | 0.375        | 0.343           |
| <i>Nr6a1</i>   | 1.830        | 1.518           | 2.960        | 2.825           |
| <i>Numb</i>    | 1.047        | 0.870           | 1.024        | 1.019           |
| <i>Olig2</i>   | ND           | ND              | 3.428        | 3.307           |
| <i>Pax4</i>    | ND           | ND              | ND           | ND              |
| <i>Pax6</i>    | 0.928        | 0.401           | 0.715        | 0.616           |

**Table S2. Cont.**

| Gene             | Static day 3 | Perfusion day 3 | Static day 5 | Perfusion day 5 |
|------------------|--------------|-----------------|--------------|-----------------|
| <i>Pdx1</i>      | 1.242        | 1.196           | 1.999        | 1.320           |
| <i>Pecam1</i>    | 1.311        | 0.896           | 0.954        | 0.708           |
| <i>Podxl</i>     | 3.014        | 2.508           | 4.055        | 2.474           |
| <i>Pou5f1</i>    | 0.668        | 0.607           | 0.580        | 0.672           |
| <i>Pten</i>      | 0.909        | 1.183           | 0.860        | 1.899           |
| <i>Ptf1a</i>     | ND           | ND              | ND           | ND              |
| <i>Rest</i>      | 1.005        | 0.999           | 0.601        | 0.832           |
| <i>Runx2</i>     | ND           | ND              | ND           | ND              |
| <i>Sema3a</i>    | ND           | ND              | ND           | ND              |
| <i>Serpina1a</i> | ND           | ND              | ND           | ND              |
| <i>Sfrp2</i>     | 1.432        | 1.648           | 0.466        | 3.535           |
| <i>Sox17</i>     | 3.847        | 7.482           | 10.93        | 7.607           |
| <i>Sox2</i>      | 1.143        | 0.761           | 0.760        | 0.699           |
| <i>Sst</i>       | ND           | ND              | ND           | ND              |
| <i>Sycp3</i>     | 2.686        | 2.454           | 4.031        | 2.902           |
| <i>T</i>         | 0.979        | 1.167           | 1.953        | 23.96           |
| <i>Tat</i>       | 1.427        | 2.004           | 3.127        | 3.958           |
| <i>Tcfcp2l1</i>  | 0.777        | 0.477           | 0.592        | 0.308           |
| <i>TdGF1</i>     | 1.234        | 0.600           | 1.454        | 0.728           |
| <i>Tert</i>      | 1.746        | 0.842           | 1.463        | 1.075           |
| <i>Utf1</i>      | 0.910        | 0.968           | 0.704        | 0.930           |
| <i>Wt1</i>       | 6.734        | 6.560           | 12.69        | 5.379           |
| <i>Zfp42</i>     | 0.601        | 0.510           | 0.312        | 0.169           |

ND, not detected, indicating expression levels below the quantitative PCR detection limit of 35 cycles.
